# Supplementary material for: Plasma-derived proteomic biomarkers in human leukocyte antigen-haploidentical or human leukocyte antigen-matched bone marrow transplantation using post-transplantation cyclophosphamide
Source: PubMed Central journal article supplement — Haematologica. 2017 May;102(5):932–40. doi: 10.3324/haematol.2016.152322 (PMC5477612; doi:10.3324/haematol.2016.152322), 2017-05
Supplement: 2016_152322-Disclosures_and_Contributions.pdf [file 2016_152322-Disclosures_and_Contributions.pdf]

Haematologica  
HAEMATOL/2016/152322  
Version 3

Plasma-derived proteomic biomarkers in HLA-haploidentical or HLA-matched bone marrow transplantation using post-transplantation cyclophosphamide

Christopher G. Kanakry, Giorgos Bakoyannis, Susan M. Perkins, Shannon R. McCurdy, Ante Vulic, Edus H. Warren, Etienne Daguindau, Taylor Olmsted, Christen Mumaw, Andrea M.H. Towlerton, Kenneth R. Cooke, Paul V. O'Donnell, Heather J. Symons, Sophie Paczesny, and Leo Luznik

Disclosures: This work was supported by awards from the NIH (R01 HL110907 to L.L. and R01 CA16884 to S.P.), the Leukemia & Lymphoma Society Scholar Award (1293-15, to S.P.), the Lilly Physician Scientist Initiative Award (to S.P.), and a grant from Otsuka Pharmaceutical (to L.L.). S.P. has a patent on "Methods of detection of graft-versus-host disease" licensed to Viracor-IBT Laboratories. The other authors have no conflicts of interest.

Contributions: C.G.K., G.B., S.M.P., S.P., and L.L. designed the study. P.V.O., H.J.S., and L.L. designed the clinical studies from which samples used in this work were obtained. C.G.K., S.R.M., E.H.W., H.J.S., and L.L. obtained and reviewed clinical data. S.R.M., A.V., E.D., T.O., C.M., A.M.H.T., and S.P. processed plasma samples and ran assays. C.G.K. collated clinical and laboratory data. G.B. and S.M.P. performed statistical analyses. C.G.K., G.B., S.M.P., S.P., and L.L. analyzed data. C.G.K., G.B., S.M.P., K.R.C., S.P., and L.L. interpreted data. C.G.K. and G.B. designed the figures. G.B. prepared all figures. C.G.K. wrote the manuscript, and all authors edited the manuscript.
